# Supplementary material
Source: HighWire-hosted journal article supplement (https://molpharm.aspetjournals.org/highwire/filestream/86473/field_highwire_adjunct_files/0/MOL184Supp.pdf)

**Supplemental data for manuscript # MOLPHARM-AR-2020-000184**

**Cysteine modification by ebselen reduces the stability and cellular levels of 14-3-3 proteins**

Kai Waløen, Jung K.C. Kunwar, Elisa D. Vecchia, Sunil Pandey, Norbert Gasparik, Anne Døskeland, Sudarshan Patil, Rune Kleppe, Jozef Hritz, William H.J. Norton, Aurora Martinez, and Jan Haavik

| ID | Drug name                  | Formula                                                                             | Therapeutic class/<br>therapeutic effect | $\Delta T_m$ at 400<br>$\mu\text{M}$<br>( $^{\circ}\text{C}$ ) |
|----|----------------------------|-------------------------------------------------------------------------------------|------------------------------------------|----------------------------------------------------------------|
| 1  | Fulvestrant*               | 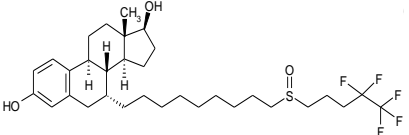   | Endocrinology/<br>Antineoplastic         | -23.6                                                          |
| 2  | Cefoxitin                  |    | Metabolism/<br>Antibacterial             | -17.3                                                          |
| 3  | Thimerosal                 |    | Infectiology/<br>Antiseptic              | -11.7                                                          |
| 4  | Rabeprazole <sup>1</sup>   |    | Metabolism/<br>Antiulcer                 | -11.4                                                          |
| 5  | Mercaptopurine             |    | Immunology/<br>Immunosuppressant         | -10.8                                                          |
| 6  | Thioguanosine              |   | Metabolism/<br>Antineoplastic            | -9.2                                                           |
| 7  | Tenatoprazole <sup>1</sup> |  | Metabolism/<br>Antiulcer                 | -8.6                                                           |
| 8  | Altrenogest*               |  | Endocrinology/<br>Progestogen            | -8.4                                                           |
| 9  | Nifedipine <sup>2</sup>    |  | Cardiovascular/<br>Antianginal           | -7.2                                                           |
| 10 | Pinaverium <sup>2</sup>    |  | Neuromuscular/<br>Antispastic            | -6.7                                                           |
| 11 | Ebselen                    |  | Metabolism/<br>Anti-inflammatory         | -7.0                                                           |

|    |                              |                                                                                   |                                |      |
|----|------------------------------|-----------------------------------------------------------------------------------|--------------------------------|------|
| 12 | Lansoprazole <sup>1</sup>    | 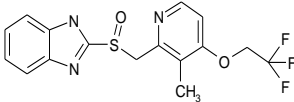 | Metabolism/<br>Antiulcer       | -6.0 |
| 13 | Cefaclor                     |  | Infectiology/<br>Antibacterial | -6.0 |
| 14 | Nisoldipine <sup>2</sup>     |  | Cardiovascular/<br>Antianginal | -5.8 |
| 15 | Carbenoxolone <sup>*,3</sup> |  | Metabolism/<br>Antiulcer       | -5.1 |

**Supplemental Table 1. Small-molecule drug hits obtained from the primary DSF screen.** The midpoint melting temperature ( $T_m$ ) of 14-3-3 $\zeta$  with 4% DMSO was  $61.1 \pm 0.5^\circ\text{C}$ , and 15 hits that caused  $|\Delta T_m| \geq 10 \times \text{SD}$  ( $5.1^\circ\text{C}$ ), used as a cut-off value, were selected for concentration dependent studies. Based on its consistent concentration-dependent effect and reduced toxicity, ebselen was selected for further studies. \*Steroids. <sup>1</sup>Proton pump inhibitor. <sup>2</sup>Calcium channel blocker <sup>3</sup>Probable calcium channel blocker

```

1 [
1 epsilon -MDDREDLVYQAKLAEQAERYDEMVSMMKAVGMDVELTVEERNLLSVAYKNVIGARRASWRISSIEQKEENKGGEDKL 80
2 sigma --MERASLIQKAKLAEQAERYEDMAAFMKGAVEKGEELSCEERNLLSVAYKNVVGQRAAWRVLSSIEQKSNEEGSEKKG
3 gamma --MVDREQLVQKARLAEQAERYDDMAAMKNVTELNEPLSNEERNLLSVAYKNVVGARRSSWRVSSIEQKTSADGNEKKI
4 eta --MGDREQLLQKARLAEQAERYDDMASAMKAVTELNEPLSNEERNLLSVAYKNVVGARRSSWRVSSIEQKTMADGNEKKL
5 theta --MEKTELIQKAKLAEQAERYDDMATCMKAVTEQGAELSNEERNLLSVAYKNVVGARRSARVSSIEQKT--DTSDKKL
6 beta MTMDKSELVQKAKLAEQAERYDDMAAMKAVTEQGHLSNEERNLLSVAYKNVVGARRSSWRVSSIEQKT--ERNEKKKQ
7 zeta --MDKNELVQKAKLAEQAERYDDMAACMKSVTEQGAELSNEERNLLSVAYKNVVGARRSSWRVSSIEQKT--EGAEEKKQ

1
1 epsilon KMIREYRQMVETELKLI CCD I LDVLDKHLI PAAN--TGESKVFYKMKGDYHRYLAEPATGNDRKEAAENSLVAYKAASD 160
2 sigma PEVREYREKVTETELQGVCDTVLGLLDSHLIKEAG--DAESRVFYLKMKGDYRYLAEVATGDDKKRIIDSARSAYQEAAMD
3 gamma EMVRAYREKIEKELEAVCQDVLSLLDNYLIKNCSETQYESKVFYKMKGDYRYLAEVATGEKRATVVSSEKAYSEAFE
4 eta EKVKAYREKIEKELETVCNDVLSLLDKFLIKNCNDFQYESKVFYKMKGDYRYLAEVASGEKNSVVEASEAAYKEAFE
5 theta QL IKDYREKVESELRSI CTTVLELLDKYLI ANAT--NPESKVFYKMKGDYFRYLAEVACGDDRRQTIDNSQGAYQEAFFD
6 beta QMGKEYREKIEAELQDI CNDVLELLDKYLI PNAT--QPESKVFYKMKGDYFRYLAEVASGDNKQTTVSNSSQAYQEAFFD
7 zeta QMAREYREKIE TELRDI CNDVLSLLEKFLI PNAS--QAESKVFYKMKGDYRYLAEVAAGDDKKGI VDSQQAYQEAFFD

1
1 epsilon IAMTELPPTHPIRLGLALNFSVFYIEILNSPDRACRLAKAAFDDAIAELDTLSEESYKDSLIMQLLRDNLTLWTSDMQG 240
2 sigma ISKKEPPTNPIRLGLALNFSVFHYEIANSPEEAISLAKTTFDEAMADLHTLSEDSYKDSLIMQLLRDNLTLWTADNAG
3 gamma ISKKEHQPTHPIRLGLALNFSVFYIEIQNAPEQACHLAKTAFDDAIAELDTLNEDSYKDSLIMQLLRDNLTLWTSQQD
4 eta ISKKEQMPTHPIRLGLALNFSVFYIEIQNAPEQACHLAKQAFDDAIAELDTLNEDSYKDSLIMQLLRDNLTLWTSQQD
5 theta ISKKEQMPTHPIRLGLALNFSVFYIEILNPELACTLAKTAFDEAIAELDTLNEDSYKDSLIMQLLRDNLTLWTSDSAG
6 beta ISKKEQMPTHPIRLGLALNFSVFYIEILNSPEKACSLAKTAFDEAIAELDTLNEDSYKDSLIMQLLRDNLTLWTSENQG
7 zeta ISKKEQMPTHPIRLGLALNFSVFYIEILNSPEKACSLAKTAFDEAIAELDTLSEESYKDSLIMQLLRDNLTLWTSDTQG

1
1 epsilon DGEEQNKEALQDVEDENQ
2 sigma EEGGEAPQEPQS-----
3 gamma DDGGEGNN-----
4 eta EEAGEGN-----
5 theta EECDAAEGAEN-----
6 beta DEGDAGEGEN-----+
7 zeta DEAEAGEGGEN-----

```

**Supplemental Figure S1.** Amino acid sequences of the seven isoforms of 14-3-3 are presented. The cysteine residues are highlighted in yellow.

**A** 14-3-3ζ C25A-C189A Trypsinated

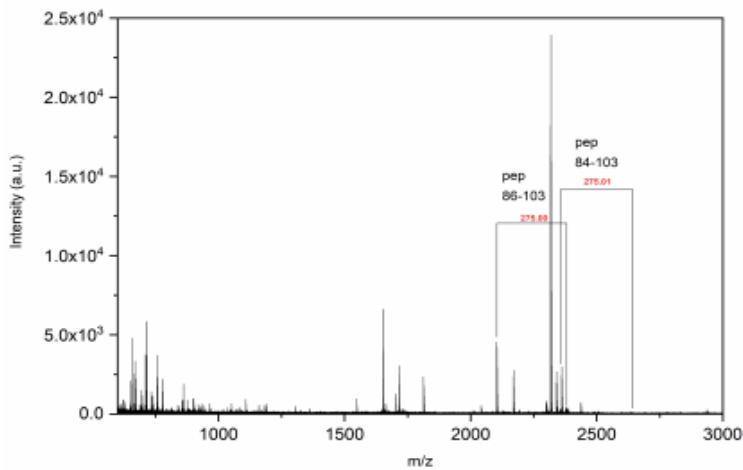

**B** 14-3-3ζ C94A Trypsinated

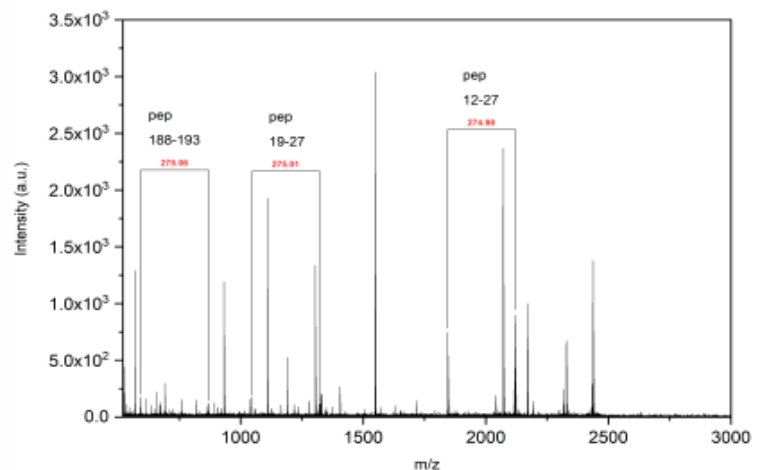

**Supplemental Figure S2.** MALDI-TOF MS/MS peptide analysis of tryptic digested 1433ζ mutant constructs. a) 1433ζ-C25A-C189A and b) 1433ζ-C94A, after ebselen treatment. Peptides containing cysteines in tagged and untagged form (peptides with a mass shift of 275 Da) are denoted. In a) the figure shows two peptides involving ebselen tagging of C94 in very small amounts. In b) the figure shows a peptide involving C189 and two peptides involving C25.

**Supplementary Figure S3.** Viability of SHSY5Y cells treated with increasing concentration of ebselen and ebselen oxide. A Cell Titer-Blue assay was performed to examine cell viability of SHSY5Y cells treated with increasing concentration of ebselen and ebselen oxide. The cells were plated in 96-well plates at the density of 25000 cells per well and 5 h later were treated with different concentration of ebselen, ebselen oxide and DMSO (0.05%). Cells were then incubated for 16 h and then 20  $\mu$ L of Cell Titer Blue reagent was added to each well. The plates were incubated for 2hrs before the fluorescence ( $\lambda=590$ ) was measured with Victor 3 1420 Multilabel counter plate reader. A, Cell images using ebselen, B, relative cell viability using ebselen, C Cell images using ebselen oxide D, relative cell viability with ebselen oxide. Statistical analyses by 2-tailed Student's t test. (\*)  $p < 0.05$ , (\*\*)  $p < 0.005$ , (\*\*\*)  $p < 0.001$ , (\*\*\*\*)  $p < 0.0001$ . All data are presented as mean  $\pm$  SEM.

**A**

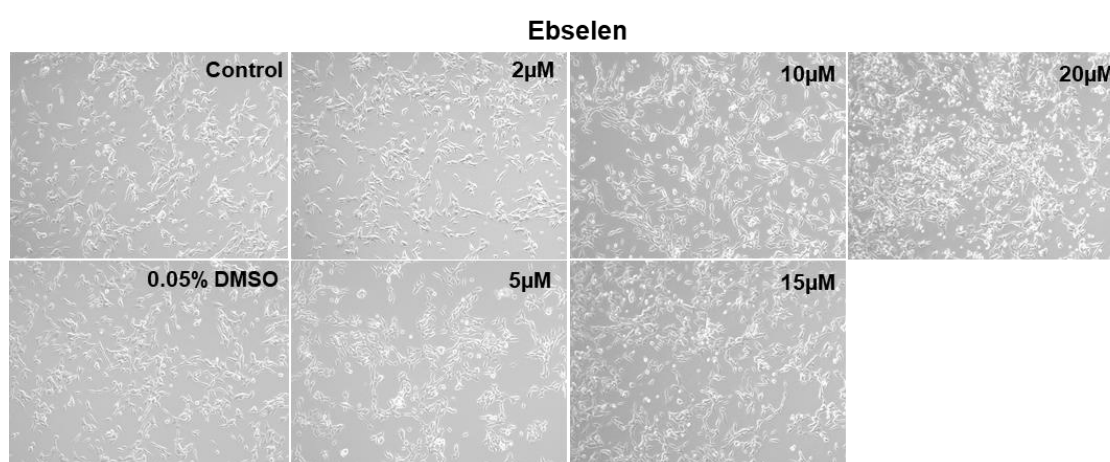

**B**

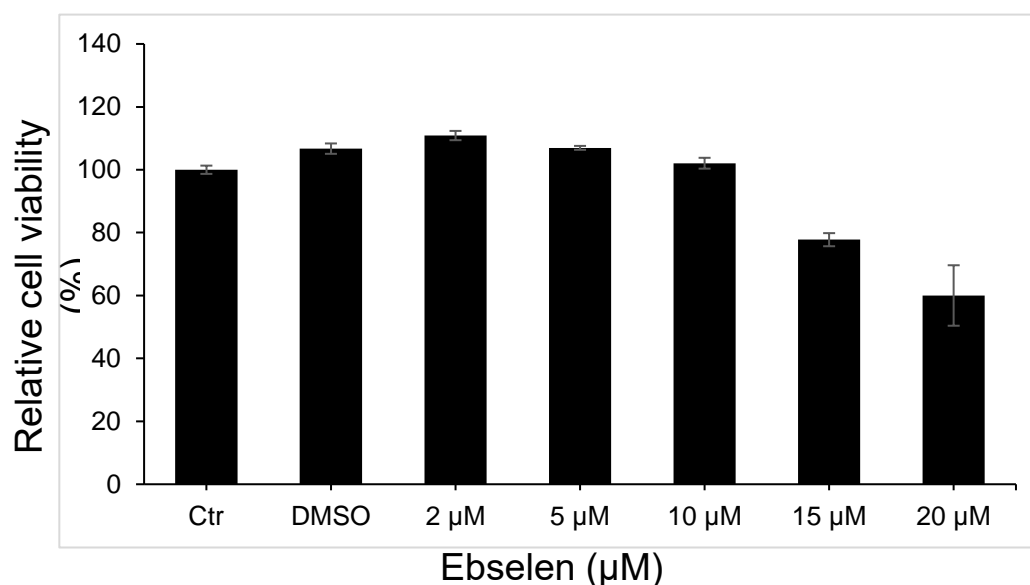

C

Ebselen oxide

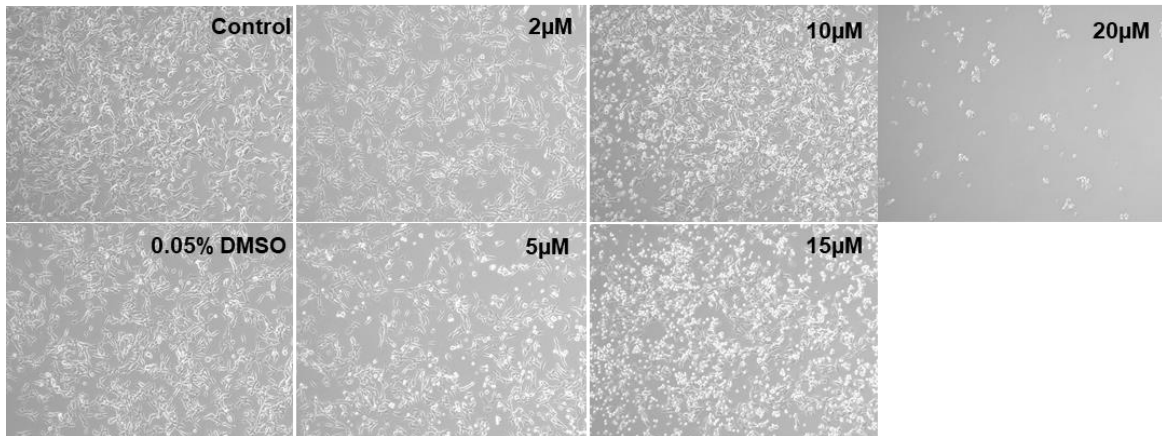

D

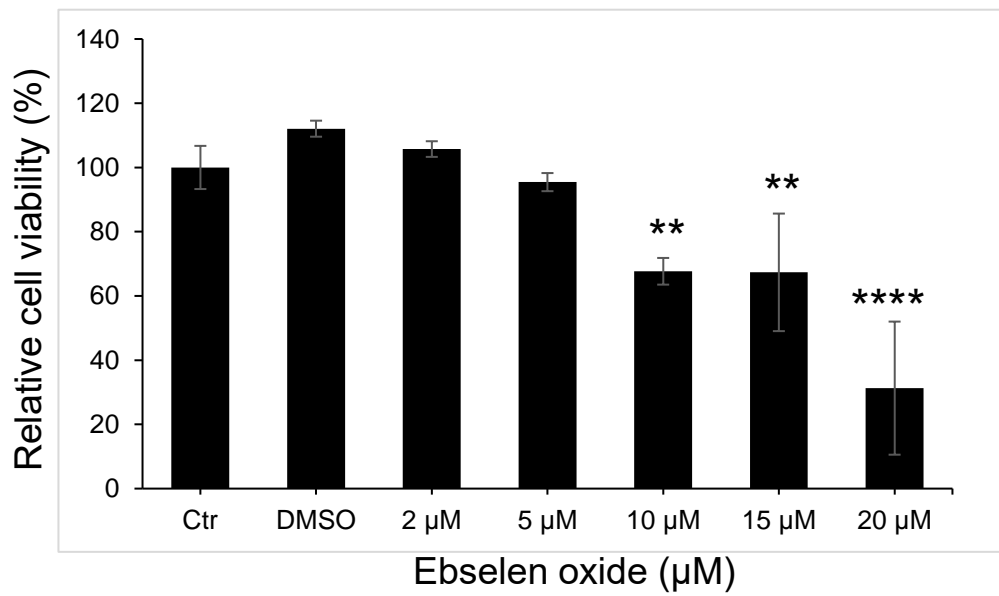

Supplement: MOL184Supp.pdf [file MOL184Supp.pdf]
